# Supplementary material for: Maternal Uniparental Isodisomy of Chromosome 4 and 8 in Patients with Retinal Dystrophy: SRD5A3-Congenital Disorders of Glycosylation and RP1-Related Retinitis Pigmentosa
Source: MDPI journal article supplement (doi:10.3390/genes13020359), 2022-02-16
Supplement: s1 [file s1]

**Supplementary Table S2. Rare homozygous variants on chromosome 8 in patient 2**

| Gene           | Variant                                              | OMIM (MIM number)                                                     | SIFT  | PROVEAN | PP2<br>HVAR | CADD<br>phred | M-CAP |
|----------------|------------------------------------------------------|-----------------------------------------------------------------------|-------|---------|-------------|---------------|-------|
| <i>RP1L1</i>   | NM_178857.6:c.6231_6257del<br>p.(Glu2077_Val2085del) | Retinitis pigmentosa 88 (618826)<br>Occult macular dystrophy (613587) | -     | -       | -           | 3.967         | -     |
| <i>TRMT9B</i>  | NM_020844.3:c.806G>C<br>p.(Arg269Thr)                | —                                                                     | 0.008 | -0.88   | 0.150       | 19.28         | 0.010 |
| <i>RHOBTB2</i> | NM_001160036.2:c.2181C>G<br>p.(Asn727Lys)            | Developmental and epileptic<br>encephalopathy 64 (618004)             | 0.16  | -0.82   | 0.370       | 16.6          | 0.019 |
| <i>ADAM18</i>  | NM_014237.3:c.494A>G<br>p.(Gln165Arg)                | —                                                                     | 0.102 | -1.98   | 0.017       | 14.98         | 0.003 |
| <i>DKK4</i>    | NM_014420.3:c.199C>T<br>p.(Arg67Cys)                 | —                                                                     | 0     | -6.78   | 0.078       | 23            | 0.067 |
| <i>CDH17</i>   | NM_004063.4:c.880G>A<br>p.(Val294Met)                | —                                                                     | 0.005 | -1.69   | 0.988       | 24.8          | 0.020 |
| <i>MTSS1</i>   | NM_001282971.2:c.377A>G<br>p.(His126Arg)             | —                                                                     | 0.026 | -7.15   | 0.319       | 25.4          | 0.041 |
| <i>OPLAH</i>   | NM_017570.5:c.685G>A<br>p.(Val229Ile)                | 5-oxoprolinase deficiency (260005)                                    | 0.008 | -0.88   | 0.996       | 23.6          | 0.097 |

—: not available

For explanation of each score, see footnote of Supplementary Table 1.
