# Supplementary material for: Maternal Uniparental Isodisomy of Chromosome 4 and 8 in Patients with Retinal Dystrophy: SRD5A3-Congenital Disorders of Glycosylation and RP1-Related Retinitis Pigmentosa
Source: MDPI journal article supplement (doi:10.3390/genes13020359), 2022-02-16
Supplement: s1 [file s1]

**Supplementary Table S1. Rare homozygous variants on chromosome 4 in patient 1**

| Gene          | Variant                                   | OMIM (MIM number)                                                                      | SIFT  | PROVEAN | PP2<br>HVAR | CADD<br>phred | M-CAP |
|---------------|-------------------------------------------|----------------------------------------------------------------------------------------|-------|---------|-------------|---------------|-------|
| <i>ZNF732</i> | NM_001137608.3:c.1418C>G<br>p.(Pro473Arg) | —                                                                                      | 0.017 | -7.44   | 0.921       | 20.3          | -     |
| <i>CFAP99</i> | NM_001193282.4:c.451G>A<br>p.(Asp151Asn)  | —                                                                                      | -     | -       | -           | 9.448         | -     |
| <i>CPZ</i>    | NM_001014447.3:c.1705G>A<br>p.(Ala569Thr) | —                                                                                      | 0.628 | -0.87   | 0.012       | 3.542         | 0.005 |
| <i>GABRA4</i> | NM_000809.4:c.1051G>A<br>p.(Ala351Thr)    | —                                                                                      | 0.169 | -0.13   | 0.065       | 22.5          | 0.026 |
| <i>NIPAL1</i> | NM_207330.3:c.1019C>A<br>p.(Thr340Asn)    | —                                                                                      | 0.082 | -3.88   | 0.998       | 23            | 0.033 |
| <i>SRD5A3</i> | NM_024592.5:c.57G>C<br>p.(Trp19Cys)       | Kahrizi syndrome (612713), Congenital<br>disorder of glycosylation, type Iq (612379)   | 0.001 | -8.02   | 0.650       | 26.9          | 0.290 |
| <i>ENAM</i>   | NM_031889.3:c.2529A>C<br>p.(Arg843Ser)    | Amelogenesis imperfecta, type IC (204650)<br>Amelogenesis imperfecta, type IB (104500) | 0.061 | -3.47   | 0.053       | 4.748         | 0.006 |
| <i>ABCG2</i>  | NM_004827.3:c.1859A>G<br>p.(Asp620Gly)    | —                                                                                      | 0.028 | -4.97   | 0.111       | 22.1          | 0.060 |
| <i>NR3C2</i>  | NM_000901.5:c.218G>A<br>p.(Cys73Tyr)      | Pseudohypoaldosteronism type I (177735)                                                | 0.031 | -1.51   | 0.002       | 22.8          | 0.065 |
| <i>HPGD</i>   | NM_000860.6:c.680A>G<br>p.(Asn227Ser)     | Hypertrophic osteoarthropathy, primary<br>(259100)                                     | 0.238 | 0       | 0           | 13.46         | -     |

—: not available

SIFT (Sorting Intolerant From Tolerant) and PROVEAN (Protein Variation Effect Analyzer)

<http://provean.jcvi.org/index.php/> (accessed Sep 3. 2021; GRCh37/Ensembl 66)

SIFT: scores of  $\leq 0.05$  and those  $> 0.05$  are assessed as damaging and tolerated, respectively.

PROVEAN: scores of  $\leq -2.5$  and those  $> -2.5$  are assessed as deleterious and neutral, respectively.

Polyphen-2 Hum Var

<http://genetics.bwh.harvard.edu/pph2/> (accessed Sep 3. 2021)

HumVar scores were evaluated as 0.000 (most probably benign) to 1.000 (most probably damaging).

CADD (Combined Annotation–Dependent Depletion)

<http://cadd.gs.washington.edu/score/> (version 1.6, GRCh38/hg38)

phred scores of  $> 10$ – $20$  are regarded as deleterious, and those of  $> 20$  indicates the 1% most deleterious.

M-CAP (Mendelian Clinically Applicable Pathogenicity) Score

<http://bejerano.stanford.edu/mcap/> (accessed Sep 3. 2021; GRCh37/hg19)

scores of  $\leq 0.025$  and those  $> 0.025$  are assessed as likely benign and possibly pathogenic, respectively.
