# Supplementary material for: Maternal Uniparental Isodisomy of Chromosome 4 and 8 in Patients with Retinal Dystrophy: SRD5A3-Congenital Disorders of Glycosylation and RP1-Related Retinitis Pigmentosa
Source: MDPI journal article supplement (doi:10.3390/genes13020359), 2022-02-16
Supplement: s1 [file s1]

GTGACACTTTTTTCTAGTGATGGTTATGGTGTGGATCAGACTTCTATGAATAAGGCTTGTTTCCTAGGAGAGGTCTGTTCA  
 CTTACTGATACTGTGTTTTCTGATAAGGCTTGTGCTCAAAGGAGAACCATACCTATGAGGGAGCTTGCCCAATTGATGAGAC  
 CTACGTTCTGTCAATGTCTGCAATACCATTGACTTTTTAACTCCAAAGAAAACACGGCCGGGCGCGGTGGCTCACGCCTGT  
 AATCCCAGCACTTTGGGAGGCCGAGGCCGGCGGATCACGAGGTCAGGAGATCGAGACCATCCCGGCTAAAACGGTGAAACCCC  
 ----- **undetermined sequences** -----  
 AAAAAAAGAAAACACATATACTGATAACTTGGATTCAACTGAAGAGTTAGAAAGAGGTGATGACATTCAGAAAGATCTAA  
 ATATTTTGACAGACCCTGAATATAAAAATGGATTTAATACATTGGTGTACATCAAATGTCAGTAATTTAAGCTCCTGTGGC  
 CTTTGCCTAAGTGAAAAAGAAGCAGAACTTGATAAGAAACATAGTTCTCTAGATGATTTTGAAAATTGTTCACTA

5' - *RP1* exon 4 (+ strand) - **Target site duplication** - AluY (+ strand) - **Target site duplication** - *RP1* exon 4 (+ strand) - 3'

Supplementary Figure S2. DNA sequence predicted by *de novo* assembly of the clipped reads. The AluY element insertion was predicted between the duplicated 11 bp segments (target site duplication).
