# Supplementary figures and images for: Maternal Uniparental Isodisomy of Chromosome 4 and 8 in Patients with Retinal Dystrophy: SRD5A3-Congenital Disorders of Glycosylation and RP1-Related Retinitis Pigmentosa
Source: MDPI journal article supplement (doi:10.3390/genes13020359), 2022-02-16

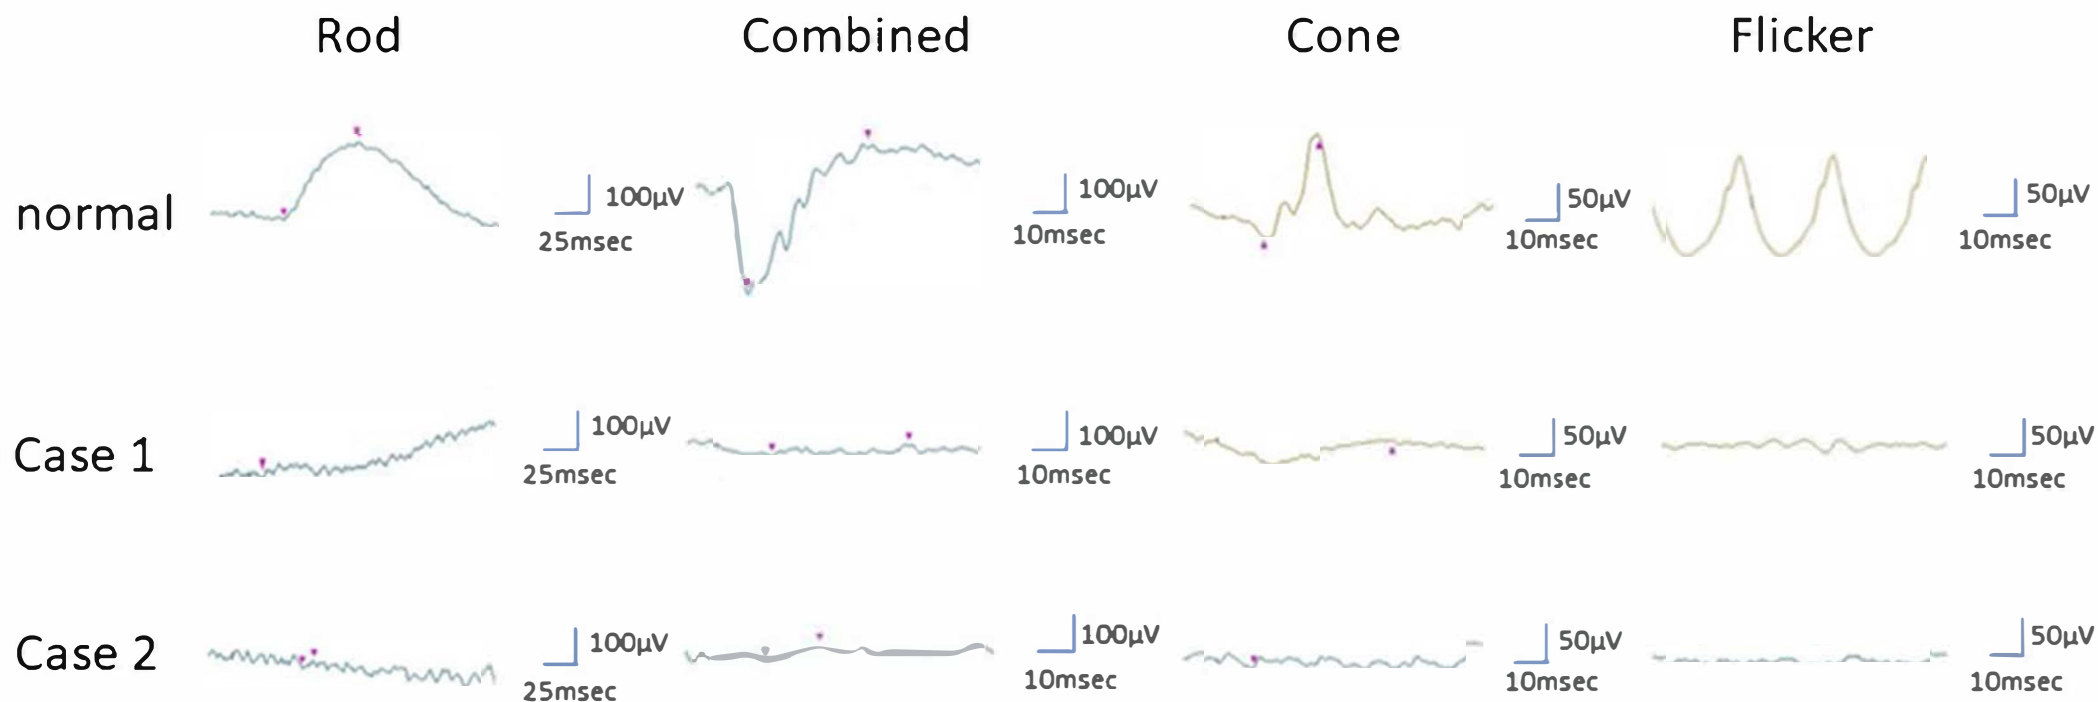

**Supplementary Figure S1.** Full-field electroretinography (ERG).

Supplement: s1 [file s1]
